# Supplementary material
Source: PubMed Central journal article supplement (PMC8463420)
Supplement: NIHMS1688357-supplement-2.pdf [file NIHMS1688357-supplement-2.pdf]

## SYSTEMIC CONDITIONS ASSOCIATED WITH DRY EYE SEVERITY

**Supplemental Table 1.** Transformation of dry eye signs to a common unit severity score from 0 to 1.

| DED sign                              | Severity Grade* |      |      |      |      |
|---------------------------------------|-----------------|------|------|------|------|
|                                       | 0.00            | 0.25 | 0.50 | 0.75 | 1.00 |
| TBUT (seconds)                        | 35              | 7    | 5    | 2    | 0    |
| Schirmer's test (mm/5min)             | 45              | 7    | 5    | 3    | 0    |
| Corneal fluorescein staining          | 0               | 3    | 6    | 9    | 15   |
| Conjunctival lissamine green staining | 0               | 1.2  | 2.4  | 3.6  | 6    |
| Tear osmolarity (mOsm/L)              | 275             | 308  | 324  | 364  | 400  |
| Meibomian gland dysfunction           | 0               | 0.75 | 1.5  | 2.25 | 3    |

\*Severity grades of 0.00, 0.25, 0.50, 0.75, and 1.00 correspond to the discrete 0, 1, 2, 3, and 4 dry eye severity levels described in the DEWS report (1).
