# Supplementary material
Source: PubMed Central journal article supplement (PMC8463420)
Supplement: NIHMS1688357-supplement-3.pdf [file NIHMS1688357-supplement-3.pdf]

## SYSTEMIC CONDITIONS ASSOCIATED WITH DRY EYE SEVERITY

**Supplemental Table 2.** Associations of age, sex, and race with severity of dry eye signs and symptoms at baseline.

|                                                 | Age                                 |       | Sex                         |                           |       | Race                       |                           |                           |                           |       |
|-------------------------------------------------|-------------------------------------|-------|-----------------------------|---------------------------|-------|----------------------------|---------------------------|---------------------------|---------------------------|-------|
|                                                 | Generalized linear coefficient (SE) | p*    | Female (N=434)<br>Mean (SD) | Male (N=101)<br>Mean (SD) | p*    | White (N=398)<br>Mean (SD) | Black (N=64)<br>Mean (SD) | Asian (N=19)<br>Mean (SD) | Other (N=54)<br>Mean (SD) | p*    |
| <b>Dry eye signs</b>                            |                                     |       |                             |                           |       |                            |                           |                           |                           |       |
| OSDI                                            | -0.072 (0.051)                      | 0.16  | 42.6 (15.5)                 | 39.8 (15.4)               | 0.09  | 42.5 (15.4)                | 37.9 (14.6)               | 39.3 (12.9)               | 45.0 (17.3)               | 0.048 |
| Tear break-up time (seconds)                    | -0.009 (0.005)                      | 0.08  | 3.1 (1.8)                   | 3.3 (1.5)                 | 0.11  | 3.1 (1.7)                  | 3.1 (1.9)                 | 3.0 (1.4)                 | 3.7 (1.7)                 | 0.03  |
| Schirmer's test (mm/5min)                       | -0.07 (0.023)                       | 0.002 | 9.0 (6.6)                   | 12.2 (8.3)                | <.001 | 8.8 (6.6)                  | 10.8 (6.8)                | 11.6 (8.9)                | 12.8 (8.6)                | <.001 |
| Fluorescein staining of cornea                  | 0.039 (0.008)                       | <.001 | 4.0 (3.0)                   | 2.9 (2.5)                 | <.001 | 4.0 (3.0)                  | 3.6 (2.5)                 | 3.9 (2.6)                 | 2.3 (3.0)                 | <.001 |
| Lissamine green staining of conjunctiva         | 0.004 (0.004)                       | 0.31  | 3.0 (1.5)                   | 2.7 (1.4)                 | 0.02  | 2.9 (1.5)                  | 2.5 (1.3)                 | 3.1 (1.7)                 | 3.4 (1.6)                 | 0.001 |
| Tear osmolarity (mOsm/L)                        | 0.100 (0.052)                       | 0.052 | 302.7 (15.7)                | 302.6 (18.4)              | 0.97  | 302.4 (15.8)               | 306.5 (18.0)              | 303.7 (15.1)              | 300.3 (16.7)              | 0.26  |
| Meibomian gland dysfunction                     | 0.004 (0.003)                       | 0.16  | 1.57 (0.92)                 | 1.43 (0.92)               | 0.11  | 1.52 (0.90)                | 1.45 (0.99)               | 1.62 (1.01)               | 1.79 (0.96)               | 0.11  |
| Composite dry eye severity score based on Signs | 0.001 (0.0004)                      | <.001 | 0.47 (0.12)                 | 0.42 (0.10)               | <.001 | 0.47 (0.13)                | 0.44 (0.10)               | 0.46 (0.12)               | 0.43 (0.12)               | 0.06  |

\*P-values for the statistical significance of association between age, sex, or race and the outcome measure of interest were calculated from generalized linear regression models. Generalized estimating equations (GEE) were used to account for inter-eye correlations within the same subject.
