# Supplementary material
Source: PubMed Central journal article supplement (PMC8463420)
Supplement: NIHMS1688357-supplement-6.pdf [file NIHMS1688357-supplement-6.pdf]

## SYSTEMIC CONDITIONS ASSOCIATED WITH DRY EYE SEVERITY

**Supplemental Table 5.** Associations of systemic conditions with OSDI from separate analyses for baseline, 6 months, and 12 months.

|                           | OSDI        |             |      |             |             |       |             |             |      |
|---------------------------|-------------|-------------|------|-------------|-------------|-------|-------------|-------------|------|
|                           | Baseline    |             |      | 6 months    |             |       | 12 months   |             |      |
|                           | No          | Yes         |      | No          | Yes         |       | No          | Yes         |      |
|                           | Mean (SD)   | Mean (SD)   | p*   | Mean (SD)   | Mean (SD)   | p*    | Mean (SD)   | Mean (SD)   | p*   |
| Sjögren's syndrome        | 41.7 (15.6) | 42.6 (15.5) | 0.89 | 31.3 (18.8) | 35.0 (19.2) | 0.23  | 29.1 (18.1) | 36.1 (18.6) | 0.03 |
| Rosacea (facial)          | 41.6 (15.3) | 44.0 (16.4) | 0.25 | 31.7 (19.1) | 33.7 (19.3) | 0.36  | 29.9 (18.7) | 32.6 (18.0) | 0.27 |
| Rheumatoid arthritis†     | 41.8 (15.6) | 40.5 (15.0) | 0.63 | 30.8 (18.6) | 37.2 (21.2) | 0.07  | 28.7 (18.0) | 34.4 (19.5) | 0.06 |
| Daily smoking history     | 41.7 (15.2) | 42.9 (16.3) | 0.20 | 31.1 (19.3) | 34.4 (18.4) | 0.049 | 29.3 (18.7) | 33.0 (18.2) | 0.04 |
| Peripheral artery disease | 42.1 (15.5) | 41.2 (15.5) | 0.97 | 31.6 (19.0) | 38.6 (19.0) | 0.02  | 30.1 (18.5) | 34.5 (18.4) | 0.10 |
| Thyroid dysfunction       | 42.6 (15.7) | 40.1 (15.5) | 0.19 | 32.4 (19.0) | 31.9 (19.9) | 0.77  | 30.5 (18.8) | 30.9 (18.4) | 0.88 |
| Osteoarthritis            | 42.5 (15.6) | 40.4 (14.8) | 0.21 | 31.9 (19.3) | 32.2 (17.7) | 0.81  | 29.9 (19.1) | 31.3 (16.7) | 0.53 |
| Diabetes                  | 42.0 (15.4) | 41.9 (16.2) | 0.46 | 31.9 (18.6) | 34.2 (22.6) | 0.35  | 30.3 (18.4) | 31.9 (19.7) | 0.37 |
| Irritable bowel syndrome  | 42.2 (15.6) | 40.8 (15.3) | 0.56 | 31.5 (18.8) | 38.7 (22.1) | 0.07  | 30.0 (18.4) | 35.1 (20.4) | 0.17 |
| Hypercholesterolemia      | 42.7 (15.5) | 41.0 (15.8) | 0.41 | 33.5 (19.6) | 30.0 (17.7) | 0.08  | 30.8 (18.9) | 30.8 (18.1) | 0.96 |
| Hypertension              | 42.2 (15.6) | 41.9 (15.5) | 0.49 | 33.0 (19.4) | 30.3 (18.4) | 0.28  | 31.0 (19.0) | 29.3 (17.5) | 0.52 |
| Hypertriglyceridemia      | 42.2 (15.6) | 40.7 (14.0) | 0.78 | 32.2 (19.3) | 32.7 (15.7) | 0.82  | 30.5 (18.7) | 28.9 (16.0) | 0.65 |

\*P-values for the statistical significance of association between a systemic condition and OSDI were calculated from generalized linear regression models adjusted by age, sex, and race. Generalized estimating equations (GEE) were used to account for inter-eye correlations within the same subject.

†Excluding patients meeting 2012 ACR criteria for Sjögren's syndrome.
